# Supplementary material for: Characterization of trace metal content in the developing zebrafish embryo
Source: PLoS One. 2017 Jun 15;12(6):e0179318. doi: 10.1371/journal.pone.0179318 (PMC5472288; doi:10.1371/journal.pone.0179318)
Supplement: S1 Fig — This Excel file, entitled “raw data for metal analyses revised stats”, contains three worksheets. The first and second worksheets contain raw data and statistical analyses for data presented in Figs 1 and 2. The third worksheet contains raw data on the comparison of metal measurements in a subset of zebrafish samples by GFAAS and ICPMS. (XLSX) [file pone.0179318.s001.xlsx]

## Sheet: Fig. 1
Data for Fig. 1A																			Statistical analysis (output copied from Sigmaplot)
		replicate	oocytes	2-cell	512-cell	blastula	30% epiboly	50% epiboly	6 hpf	12 hpf	24 hpf	36 hpf	48 hpf	60 hpf	72 hpf				One Way Analysis of Variance
# embryos		1	20	50	50	50	50	36	20	20	20	10	10	10	10				Normality Test (Shapiro-Wilk)			Failed	(P < 0.050)
in replicate		2	20	50	50	50	50	50	20	20	10	10	10	10	10				Test execution ended by user request, ANOVA on Ranks begun
		3	20	50	50	50	50	12	20	20	10	10	10	10	10
		4	20	50	50	50	50	50	20	20	10	10	10	10	10				Kruskal-Wallis One Way Analysis of Variance on Ranks
		5	20	50	50	50	50	50	20	20	10	10	10	10	10			sample	Group	N	Missing	Median	0.25	0.75
																		oocytes	Col 1	5	0	209.358	190.724	229.93
pg Cu		1	4143.09	8155.24	14984.8	10193.3	9469.2	6378.47	3801.52	4073.88	4019.29	2040.2	2239.8	2281.58	2134.91			2-cell	Col 2	5	0	189.384	170.142	251.781
		2	4187.15	14984.8	8994.77	8893.65	9531.03	8734.74	1723.37	2733.03	1527.51	2091.05	1989.22	2138.82	1642.8			512-cell	Col 3	5	0	186.691	176.301	244.777
		3	4509.73	10193.3	9334.56	8162.69	7831.02	1567.08	3711.5	4594.24	3217.38	1823.97	2331.14	2106.95	1707.18			blastula	Col 4	5	0	188.194	170.563	196.22
		4	3485.88	9469.2	9492.9	9428.75	7973.16	7010.56	2371.45	2933.87	1624.87	2377.4	1466.57	1863.52	1727.71			30% epiboly	Col 5	5	0	163.982	158.042	190.002
		5	4687.46	8858.98	8635.35	9409.68	8199.09	7618.97	2278.16	3103.75	1801.18	1584.85	1843.29	1792.82	1826.24			50% epiboly	Col 6	5	0	152.379	135.401	175.937
																		6 hpf	Col 7	5	0	118.572	100.038	187.825
pg Cu/embryo,		1	207.154	163.105	299.695	203.866	189.384	177.18	190.076	203.694	200.964	204.02	223.98	228.158	213.491			12 hpf	Col 8	5	0	155.188	141.673	216.703
body, or yolk		2	209.358	299.695	179.895	177.873	190.621	174.695	86.1686	136.651	152.751	209.105	198.922	213.882	164.28			24 hpf	Col 9	5	0	180.118	157.619	261.351
		3	225.487	203.866	186.691	163.254	156.62	130.59	185.575	229.712	321.738	182.397	233.114	210.695	170.718			36 hpf	Col 10	5	0	204.02	170.441	223.422
		4	174.294	189.384	189.858	188.575	159.463	140.211	118.572	146.694	162.487	237.74	146.657	186.352	172.771			48 hpf	Col 11	5	0	198.922	165.493	228.547
		5	234.373	177.18	172.707	188.194	163.982	152.379	113.908	155.188	180.118	158.485	184.329	179.282	182.624			60 hpf	Col 12	5	0	210.695	182.817	221.02
		average	210.133	206.646	205.769	184.352	172.014	155.011	138.86	174.388	203.612	198.349	197.4	203.674	180.777			72 hpf	Col 13	5	0	172.771	167.499	198.058
		stdev	23.0066	54.148	52.9194	15.0041	16.6352	20.623	46.4109	40.247	68.5397	29.7619	34.3875	20.2978	19.4362
																			H = 18.895 with 12 degrees of freedom. (P = 0.091)
average pg Cu in mock digests (already subtracted from metal levels shown above) =								221.49
																			The differences in the median values among the treatment groups are not great enough to exclude the possibility that the difference is due to random sampling variability; there is not a statistically significant difference (P = 0.091)
Data for Fig. 1B																			Statistical analysis (output copied from Sigmaplot)
		replicate	oocytes	2-cell	512-cell	blastula	30% epiboly	50% epiboly	6 hpf	12 hpf	24 hpf	36 hpf	48 hpf	60 hpf	72 hpf				One Way Analysis of Variance
# embryos		1	20	50	50	50	50	36	20	20	20	10	10	10	10				Normality Test (Shapiro-Wilk)			Failed	(P < 0.050)
in replicate		2	20	50	50	50	50	50	20	20	10	10	10	10	10				Test execution ended by user request, ANOVA on Ranks begun
		3	20	50	50	50	50	12	20	20	10	10	10	10	10
		4	20	50	50	50	50	50	20	20	10	10	10	10	10				Kruskal-Wallis One Way Analysis of Variance on Ranks
		5	20	50	50	50	50	50	20	20	10	10	10	10	10
																		sample	Group	N	Missing	Median	0.25	0.75
pg Mn		1	1565.16	3127.93	2096.47	2223.86	2207.05	2870.57	683.74	705.874	681.011	403.051	403.051	368.452	420.993			oocytes	Col 1	5	0	66.25	55.989	82.009
		2	1126.59	1692.07	1593.83	2920.9	1497.57	188.485	447.502	551.479	405.348	552.339	552.339	375.349	415.928			2-cell	Col 2	5	0	39.635	34.684	79.229
		3	1112.99	1776.28	1912.94	1889.9	1495.18	1328.76	741.879	655.888	440.064	413.711	413.711	430.006	399.26			512-cell	Col 3	5	0	41.929	35.068	65.842
		4	1715.18	4794.95	4794.95	4794.95	4794.95	4794.95	516.411	677.606	448.3	446.722	446.722	435.776	417.927			blastula	Col 4	5	0	50.341	41.138	93.737
		5	1324.99	4794.95	4794.95	4794.95	4794.95	4794.95	464.266	545.022	310.028	254.535	254.535	312.732	1040.81			30% epiboly	Col 5	5	0	44.141	29.928	71.814
																		50% epiboly	Col 6	5	0	50.766	21.141	60.294
pg Mn/embryo,		1	78.2579	39.6354	67.1389	50.341	70.358	50.7664	34.187	35.2937	34.0506	40.3051	40.3051	36.8452	42.0993			6 hpf	Col 7	5	0	25.821	22.794	35.64
body, or yolk		2	56.3294	62.5587	41.9294	44.4773	44.1409	57.4114	22.3751	27.5739	40.5348	55.2339	55.2339	37.5349	41.5928			12 hpf	Col 8	5	0	32.794	27.413	34.587
		3	55.6496	33.8414	31.8765	58.418	29.9514	15.7071	37.094	32.7944	44.0064	41.3711	41.3711	43.0006	39.926			24 hpf	Col 9	5	0	40.535	32.527	44.418
		4	85.7591	35.5257	38.2587	37.7979	29.9037	26.5752	25.8206	33.8803	44.83	44.6722	44.6722	43.5776	41.7927			36 hpf	Col 10	5	0	41.371	32.879	49.953
		5	66.2496	95.8991	64.5456	129.056	73.2703	63.1759	23.2133	27.2511	31.0028	25.4535	25.4535	31.2732	104.081			48 hpf	Col 11	5	0	41.371	32.879	49.953
		average	68.4491	53.4921	48.7498	64.018	49.5249	42.7272	28.538	31.3587	38.8849	41.4072	41.4072	38.4463	53.8984			60 hpf	Col 12	5	0	37.535	34.059	43.289
		stdev	13.3361	26.37	16.0387	37.1405	21.1835	20.551	6.68644	3.71149	6.11952	10.6955	10.6955	5.04777	28.0656			72 hpf	Col 13	5	0	41.793	40.759	73.09
average pg Mn in mock digests (already subtracted from metal levels shown above) =								117.78											H = 24.111 with 12 degrees of freedom. (P = 0.020)
																			The differences in the median values among the treatment groups are greater than would be expected by chance; there is a statistically significant difference (P = 0.020)
																			To isolate the group or groups that differ from the others use a multiple comparison procedure.
																			All Pairwise Multiple Comparison Procedures (Dunn's Method) :
																			Comparison	Diff of Ranks	Q	P<0.05
																			Col 1 vs Col 10	24.5	2.049	Do Not Test
																			Col 1 vs Col 11	24.5	2.049	Do Not Test
																			Col 1 vs Col 12	29	2.425	No
																			Col 1 vs Col 13	16.6	1.388	Do Not Test
																			Col 1 vs Col 2	20	1.672	Do Not Test
																			Col 1 vs Col 3	18.2	1.522	Do Not Test
																			Col 1 vs Col 4	10	0.836	Do Not Test
																			Col 1 vs Col 5	20	1.672	Do Not Test
																			Col 1 vs Col 6	23.8	1.99	Do Not Test
																			Col 1 vs Col 7	45.6	3.813	Yes
																			Col 1 vs Col 8	42.4	3.546	Yes
																			Col 1 vs Col 9	27	2.258	Do Not Test
																			Col 2 vs Col 10	4.5	0.376	Do Not Test
																			Col 2 vs Col 11	4.5	0.376	Do Not Test
																			Col 2 vs Col 12	9	0.753	Do Not Test
																			Col 2 vs Col 5	0	0	Do Not Test
																			Col 2 vs Col 6	3.8	0.318	Do Not Test
																			Col 2 vs Col 7	25.6	2.141	Do Not Test
																			Col 2 vs Col 8	22.4	1.873	Do Not Test
																			Col 2 vs Col 9	7	0.585	Do Not Test
																			Col 3 vs Col 10	6.3	0.527	Do Not Test
																			Col 3 vs Col 11	6.3	0.527	Do Not Test
																			Col 3 vs Col 12	10.8	0.903	Do Not Test
																			Col 3 vs Col 2	1.8	0.151	Do Not Test
																			Col 3 vs Col 5	1.8	0.151	Do Not Test
																			Col 3 vs Col 6	5.6	0.468	Do Not Test
																			Col 3 vs Col 7	27.4	2.291	Do Not Test
																			Col 3 vs Col 8	24.2	2.024	Do Not Test
																			Col 3 vs Col 9	8.8	0.736	Do Not Test
																			Col 4 vs Col 10	14.5	1.213	Do Not Test
																			Col 4 vs Col 11	14.5	1.213	Do Not Test
																			Col 4 vs Col 12	19	1.589	Do Not Test
																			Col 4 vs Col 13	6.6	0.552	Do Not Test
																			Col 4 vs Col 2	10	0.836	Do Not Test
																			Col 4 vs Col 3	8.2	0.686	Do Not Test
																			Col 4 vs Col 5	10	0.836	Do Not Test
																			Col 4 vs Col 6	13.8	1.154	Do Not Test
																			Col 4 vs Col 7	35.6	2.977	No
																			Col 4 vs Col 8	32.4	2.709	Do Not Test
																			Col 4 vs Col 9	17	1.422	Do Not Test
																			Col 5 vs Col 10	4.5	0.376	Do Not Test
																			Col 5 vs Col 11	4.5	0.376	Do Not Test
																			Col 5 vs Col 12	9	0.753	Do Not Test
																			Col 5 vs Col 6	3.8	0.318	Do Not Test
																			Col 5 vs Col 7	25.6	2.141	Do Not Test
																			Col 5 vs Col 8	22.4	1.873	Do Not Test
																			Col 5 vs Col 9	7	0.585	Do Not Test
																			Col 6 vs Col 10	0.7	0.0585	Do Not Test
																			Col 6 vs Col 11	0.7	0.0585	Do Not Test
																			Col 6 vs Col 12	5.2	0.435	Do Not Test
																			Col 6 vs Col 7	21.8	1.823	Do Not Test
																			Col 6 vs Col 8	18.6	1.555	Do Not Test
																			Col 6 vs Col 9	3.2	0.268	Do Not Test
																			Col 8 vs Col 7	3.2	0.268	Do Not Test
																			Col 9 vs Col 12	2	0.167	Do Not Test
																			Col 9 vs Col 7	18.6	1.555	Do Not Test
																			Col 9 vs Col 8	15.4	1.288	Do Not Test
																			Col 10 vs Col 11	0	0	Do Not Test
																			Col 10 vs Col 12	4.5	0.376	Do Not Test
																			Col 10 vs Col 7	21.1	1.764	Do Not Test
																			Col 10 vs Col 8	17.9	1.497	Do Not Test
																			Col 10 vs Col 9	2.5	0.209	Do Not Test
																			Col 11 vs Col 12	4.5	0.376	Do Not Test
																			Col 11 vs Col 7	21.1	1.764	Do Not Test
																			Col 11 vs Col 8	17.9	1.497	Do Not Test
																			Col 11 vs Col 9	2.5	0.209	Do Not Test
																			Col 12 vs Col 7	16.6	1.388	Do Not Test
																			Col 12 vs Col 8	13.4	1.121	Do Not Test
																			Col 13 vs Col 10	7.9	0.661	Do Not Test
																			Col 13 vs Col 11	7.9	0.661	Do Not Test
																			Col 13 vs Col 12	12.4	1.037	Do Not Test
																			Col 13 vs Col 2	3.4	0.284	Do Not Test
																			Col 13 vs Col 3	1.6	0.134	Do Not Test
																			Col 13 vs Col 5	3.4	0.284	Do Not Test
																			Col 13 vs Col 6	7.2	0.602	Do Not Test
																			Col 13 vs Col 7	29	2.425	Do Not Test
																			Col 13 vs Col 8	25.8	2.158	Do Not Test
																			Col 13 vs Col 9	10.4	0.87	Do Not Test
																			Note: The multiple comparisons on ranks do not include an adjustment for ties.
Data for Fig. 1C																			Statistical analysis (output copied from Sigmaplot)
		replicate	oocytes	2-cell	512-cell	blastula	30% epiboly	50% epiboly	6 hpf	12 hpf	24 hpf	36 hpf	48 hpf	60 hpf	72 hpf				One Way Analysis of Variance
# embryos		1	20	50	50	50	50	50	20	20	20	10	10	10	10				Normality Test (Shapiro-Wilk)			Failed	(P < 0.050)
in replicate		2	20	50	50	50	50	12	20	20	10	10	10	10	10				Test execution ended by user request, ANOVA on Ranks begun
		3	20	50	50	50	50	50	20	20	10	10	10	10	10
		4	20	50	50	50	50	50	20	20	10	10	10	10	10				Kruskal-Wallis One Way Analysis of Variance on Ranks
		5	20						20	20	10	10	10	10	10
																		sample	Group	N	Missing	Median	0.25	0.75
ng Zn		1	150.443	329.755	269.571	271.589	267.257	258.028	109.957	122.27	121.095	60.2694	62.067	53.5003	63.8252			oocytes	Col 1	5	0	6.884	6.318	7.328
		2	129.539	286.261	265.279	257.539	247.627	53.2455	69.3649	117.899	62.0093	72.6168	64.3977	55.0087	57.775			2-cell	Col 2	4	0	5.712	5.514	6.378
		3	142.668	284.928	285.99	297.237	240.254	211.749	128.06	127.945	64.0328	62.0999	65.9709	66.2104	58.3896			512-cell	Col 3	4	0	5.352	5.308	5.638
		4	123.197	272.604	265.665	265.671	250.197	218.992	74.4886	109.773	59.9843	62.6386	53.2794	61.9631	58.6807			blastula	Col 4	4	0	5.373	5.191	5.817
		5	137.677						96.1689	125.337	81.1698	62.961	69.1068	71.022	70.0861			30% epiboly	Col 5	4	0	4.978	4.842	5.26
																		50% epiboly	Col 6	4	0	4.408	4.271	4.98
ng Zn/embryo		1	7.52213	6.5951	5.39142	5.43179	5.34515	5.16057	5.49784	6.11352	6.05473	6.02694	6.2067	5.35003	6.38252			6 hpf	Col 7	5	0	4.808	3.596	5.95
body, or yolk		2	6.47694	5.72522	5.30557	5.15078	4.95255	4.43712	3.46825	5.89494	6.20093	7.26168	6.43977	5.50087	5.7775			12 hpf	Col 8	5	0	6.114	5.692	6.332
		3	7.13339	5.69857	5.7198	5.94475	4.80507	4.23497	6.403	6.39724	6.40329	6.20999	6.59709	6.62104	5.83896			24 hpf	Col 9	5	0	6.201	6.027	7.26
		4	6.15984	5.45208	5.3133	5.31342	5.00393	4.37985	3.72443	5.48867	5.99843	6.26386	5.32794	6.19631	5.86807			36 hpf	Col 10	5	0	6.264	6.118	6.779
		5	6.88383						4.80845	6.26682	8.11698	6.2961	6.91068	7.1022	7.00861			48 hpf	Col 11	5	0	6.44	5.767	6.754
		average	6.83523	5.86774	5.43253	5.46018	5.02667	4.55313	4.78039	6.03224	6.55487	6.41171	6.29644	6.15409	6.17513			60 hpf	Col 12	5	0	6.196	5.425	6.862
		stdev	0.535633	0.50025	0.1954	0.342968	0.228434	0.4138	1.22323	0.356787	0.887161	0.486421	0.598803	0.740258	0.525142			72 hpf	Col 13	5	0	5.868	5.808	6.696
average ng Zn in mock digests (already subtracted from metal levels shown above) =								3.41											H = 36.689 with 12 degrees of freedom. (P = <0.001)
																			The differences in the median values among the treatment groups are greater than would be expected by chance; there is a statistically significant difference (P = <0.001)
																			To isolate the group or groups that differ from the others use a multiple comparison procedure.
																			All Pairwise Multiple Comparison Procedures (Dunn's Method) :
																			Comparison	Diff of Ranks	Q	P<0.05
																			Col 1 vs Col 10	7.8	0.706	Do Not Test
																			Col 1 vs Col 11	9.4	0.851	Do Not Test
																			Col 1 vs Col 12	13.8	1.249	Do Not Test
																			Col 1 vs Col 13	14.2	1.286	Do Not Test
																			Col 1 vs Col 2	20.8	1.775	Do Not Test
																			Col 1 vs Col 3	33.8	2.885	Do Not Test
																			Col 1 vs Col 4	32.3	2.757	Do Not Test
																			Col 1 vs Col 5	41.05	3.504	Yes
																			Col 1 vs Col 6	45.05	3.845	Yes
																			Col 1 vs Col 7	35.2	3.187	No
																			Col 1 vs Col 8	16.2	1.467	Do Not Test
																			Col 1 vs Col 9	8.6	0.779	Do Not Test
																			Col 2 vs Col 3	13	1.053	Do Not Test
																			Col 2 vs Col 4	11.5	0.931	Do Not Test
																			Col 2 vs Col 5	20.25	1.64	Do Not Test
																			Col 2 vs Col 6	24.25	1.964	Do Not Test
																			Col 2 vs Col 7	14.4	1.229	Do Not Test
																			Col 3 vs Col 5	7.25	0.587	Do Not Test
																			Col 3 vs Col 6	11.25	0.911	Do Not Test
																			Col 3 vs Col 7	1.4	0.12	Do Not Test
																			Col 4 vs Col 3	1.5	0.121	Do Not Test
																			Col 4 vs Col 5	8.75	0.709	Do Not Test
																			Col 4 vs Col 6	12.75	1.032	Do Not Test
																			Col 4 vs Col 7	2.9	0.248	Do Not Test
																			Col 5 vs Col 6	4	0.324	Do Not Test
																			Col 7 vs Col 5	5.85	0.499	Do Not Test
																			Col 7 vs Col 6	9.85	0.841	Do Not Test
																			Col 8 vs Col 2	4.6	0.393	Do Not Test
																			Col 8 vs Col 3	17.6	1.502	Do Not Test
																			Col 8 vs Col 4	16.1	1.374	Do Not Test
																			Col 8 vs Col 5	24.85	2.121	Do Not Test
																			Col 8 vs Col 6	28.85	2.463	Do Not Test
																			Col 8 vs Col 7	19	1.72	Do Not Test
																			Col 9 vs Col 11	0.8	0.0724	Do Not Test
																			Col 9 vs Col 12	5.2	0.471	Do Not Test
																			Col 9 vs Col 13	5.6	0.507	Do Not Test
																			Col 9 vs Col 2	12.2	1.041	Do Not Test
																			Col 9 vs Col 3	25.2	2.151	Do Not Test
																			Col 9 vs Col 4	23.7	2.023	Do Not Test
																			Col 9 vs Col 5	32.45	2.77	Do Not Test
																			Col 9 vs Col 6	36.45	3.111	Do Not Test
																			Col 9 vs Col 7	26.6	2.408	Do Not Test
																			Col 9 vs Col 8	7.6	0.688	Do Not Test
																			Col 10 vs Col 11	1.6	0.145	Do Not Test
																			Col 10 vs Col 12	6	0.543	Do Not Test
																			Col 10 vs Col 13	6.4	0.579	Do Not Test
																			Col 10 vs Col 2	13	1.11	Do Not Test
																			Col 10 vs Col 3	26	2.219	Do Not Test
																			Col 10 vs Col 4	24.5	2.091	Do Not Test
																			Col 10 vs Col 5	33.25	2.838	Do Not Test
																			Col 10 vs Col 6	37.25	3.18	No
																			Col 10 vs Col 7	27.4	2.481	Do Not Test
																			Col 10 vs Col 8	8.4	0.761	Do Not Test
																			Col 10 vs Col 9	0.8	0.0724	Do Not Test
																			Col 11 vs Col 12	4.4	0.398	Do Not Test
																			Col 11 vs Col 13	4.8	0.435	Do Not Test
																			Col 11 vs Col 2	11.4	0.973	Do Not Test
																			Col 11 vs Col 3	24.4	2.083	Do Not Test
																			Col 11 vs Col 4	22.9	1.955	Do Not Test
																			Col 11 vs Col 5	31.65	2.702	Do Not Test
																			Col 11 vs Col 6	35.65	3.043	Do Not Test
																			Col 11 vs Col 7	25.8	2.336	Do Not Test
																			Col 11 vs Col 8	6.8	0.616	Do Not Test
																			Col 12 vs Col 13	0.4	0.0362	Do Not Test
																			Col 12 vs Col 2	7	0.598	Do Not Test
																			Col 12 vs Col 3	20	1.707	Do Not Test
																			Col 12 vs Col 4	18.5	1.579	Do Not Test
																			Col 12 vs Col 5	27.25	2.326	Do Not Test
																			Col 12 vs Col 6	31.25	2.667	Do Not Test
																			Col 12 vs Col 7	21.4	1.937	Do Not Test
																			Col 12 vs Col 8	2.4	0.217	Do Not Test
																			Col 13 vs Col 2	6.6	0.563	Do Not Test
																			Col 13 vs Col 3	19.6	1.673	Do Not Test
																			Col 13 vs Col 4	18.1	1.545	Do Not Test
																			Col 13 vs Col 5	26.85	2.292	Do Not Test
																			Col 13 vs Col 6	30.85	2.633	Do Not Test
																			Col 13 vs Col 7	21	1.901	Do Not Test
																			Col 13 vs Col 8	2	0.181	Do Not Test
																			Note: The multiple comparisons on ranks do not include an adjustment for ties.
Data for Fig. 1D												Statistical analysis (output copied from Sigmaplot)
# larva in replicate		replicate	5 dpf	7 dpf	10 dpf	15 dpf	30 dpf					One Way Analysis of Variance
		1	10	5	5	5	2					Normality Test (Shapiro-Wilk)			Failed	(P < 0.050)
		2	10	5	5	5	5					Test execution ended by user request, ANOVA on Ranks begun
		3	5	5	5	5	5
		4	5	5	5	5	5					Kruskal-Wallis One Way Analysis of Variance on Ranks
		5		5	5	5	5
											stage	Group	N	Missing	Median	0.25	0.75
pg Cu		1	1023.67	1564.43	1046.21	3803.57	63160.3				5 dpf	Col 1	4	0	93.665	67.894	121.617
		2	622.04	1156.66	3262.12	7914.68	52649.1				7 dpf	Col 2	5	0	228.129	192.861	272.109
		3	640.166	925.267	4366.89	8542.3	75489.8				10 dpf	Col 3	5	0	652.424	414.307	799.247
		4	424.82	1003.34	3625.58	9153.01	73617				15 dpf	Col 4	5	0	1708.46	1171.83	2504.55
		5		1140.64	3096.86	15892.4	132393				30 dpf	Col 5	5	0	15098	12626.6	29029.4
pg Cu/larvae		1	102.367	312.886	209.242	760.714	31580.2					H = 21.356 with 4 degrees of freedom. (P = <0.001)
		2	62.204	231.333	652.424	1582.94	10529.8
		3	128.033	185.053	873.379	1708.46	15098					The differences in the median values among the treatment groups are greater than would be expected by chance; there is a statistically significant difference (P = <0.001)
		4	84.9639	200.668	725.116	1830.6	14723.4
		5		228.129	619.372	3178.49	26478.7					To isolate the group or groups that differ from the others use a multiple comparison procedure.
		average	94.392	231.614	615.906	1812.24	19682
		stdev	27.8106	49.3532	247.457	871.209	8904					All Pairwise Multiple Comparison Procedures (Dunn's Method) :
average pg Cu in mock digests (already subtracted from metal levels shown above) =								394.38				Comparison	Diff of Ranks	Q	P<0.05
												Col 2 vs Col 1	5.1	1.075	Do Not Test
												Col 3 vs Col 1	9.1	1.918	No
												Col 3 vs Col 2	4	0.894	Do Not Test
												Col 4 vs Col 1	14.3	3.015	Yes
												Col 4 vs Col 2	9.2	2.057	No
												Col 4 vs Col 3	5.2	1.163	Do Not Test
												Col 5 vs Col 1	19.5	4.111	Yes
												Col 5 vs Col 2	14.4	3.22	Yes
												Col 5 vs Col 3	10.4	2.326	No
												Col 5 vs Col 4	5.2	1.163	Do Not Test
												Note: The multiple comparisons on ranks do not include an adjustment for ties.
Data for Fig. 1E												Statistical analysis (output copied from Sigmaplot)
# larva in replicate		replicate	5 dpf	7 dpf	10 dpf	15 dpf	30 dpf					One Way Analysis of Variance
		1	10	5	5	5	2					Normality Test (Shapiro-Wilk)			Failed	(P < 0.050)
		2	10	5	5	5	5					Test execution ended by user request, ANOVA on Ranks begun
		3	5	5	5	5	5
		4	5	5	5	5	5					Kruskal-Wallis One Way Analysis of Variance on Ranks
		5		5	5	5	5
											stage	Group	N	Missing	Median	0.25	0.75
pg Mn		1	139.347	407.062	1304.86	5177.06	31841.4				5 dpf	Col 1	4	0	13.834	9.607	23.252
		2	82.3208	718.918	3811.66	6716.72	46764				7 dpf	Col 2	5	0	133.14	100.185	149.772
		3	68.6655	778.802	6513.16	5643.36	70594.2				10 dpf	Col 3	5	0	762.332	493.687	1059.22
		4	131.791	594.788	3632.01	5441.06	63951.7				15 dpf	Col 4	5	0	1128.67	1061.81	1729.52
		5		665.701	4079.01	10578.5	116381				30 dpf	Col 5	5	0	14118.8	11071.6	19598.4
pg Mn/larvae		1	13.9347	81.4123	260.972	1035.41	15920.7					H = 21.572 with 4 degrees of freedom. (P = <0.001)
		2	8.23208	143.784	762.332	1343.34	9352.79
		3	13.7331	155.76	1302.63	1128.67	14118.8					The differences in the median values among the treatment groups are greater than would be expected by chance; there is a statistically significant difference (P = <0.001)
		4	26.3582	118.958	726.401	1088.21	12790.3
		5		133.14	815.802	2115.69	23276.2					To isolate the group or groups that differ from the others use a multiple comparison procedure.
		average	15.5645	126.611	773.628	1342.27	15091.8
		stdev	7.66547	28.6736	369.729	447.916	5168.43					All Pairwise Multiple Comparison Procedures (Dunn's Method) :
average pg Mn in mock digests (already subtracted from metal levels shown above) =								200.801				Comparison	Diff of Ranks	Q	P<0.05
												Col 2 vs Col 1	4.5	0.949	Do Not Test
												Col 3 vs Col 1	10.1	2.129	No
												Col 3 vs Col 2	5.6	1.252	Do Not Test
												Col 4 vs Col 1	13.9	2.93	Yes
												Col 4 vs Col 2	9.4	2.102	No
												Col 4 vs Col 3	3.8	0.85	Do Not Test
												Col 5 vs Col 1	19.5	4.111	Yes
												Col 5 vs Col 2	15	3.354	Yes
												Col 5 vs Col 3	9.4	2.102	No
												Col 5 vs Col 4	5.6	1.252	Do Not Test
												Note: The multiple comparisons on ranks do not include an adjustment for ties.
Data for Fig. 1F												Statistical analysis (output copied from Sigmaplot)
# larva in replicate		replicate	5 dpf	7 dpf	10 dpf	15 dpf	30 dpf					One Way Analysis of Variance
		1	10	5	5	5	2					Normality Test (Shapiro-Wilk)			Failed	(P < 0.050)
		2	10	5	5	5	5					Test execution ended by user request, ANOVA on Ranks begun
		3	5	5	5	5	5
		4	5	5	5	5	5					Kruskal-Wallis One Way Analysis of Variance on Ranks
		5		5	5	5	5
											stage	Group	N	Missing	Median	0.25	0.75
ng Zn		1	37.2345	36.4717	38.3312	77.9206	1981				5 dpf	Col 1	4	0	4.302	2.97	7.497
		2	27.195	41.2867	92.6449	233.163	2136.5				7 dpf	Col 2	5	0	8.257	7.168	12.026
		3	41.8463	35.2048	96.501	230.208	2442.4				10 dpf	Col 3	5	0	19.3	13.098	32.638
		4	24.3985	69.1708	165.227	437.41	3474.02				15 dpf	Col 4	5	0	46.633	30.813	94.299
		5		51.0878	161.155	505.578	5143.09				30 dpf	Col 5	5	0	694.805	457.889	1009.56
pg Zn/larvae		1	3.72345	7.29435	7.66624	15.5841	990.5					H = 19.924 with 4 degrees of freedom. (P = <0.001)
		2	2.7195	8.25733	18.529	46.6326	427.3
		3	8.36926	7.04096	19.3002	46.0417	488.479					The differences in the median values among the treatment groups are greater than would be expected by chance; there is a statistically significant difference (P = <0.001)
		4	4.8797	13.8342	33.0455	87.482	694.805
		5		10.2176	32.2311	101.116	1028.62					To isolate the group or groups that differ from the others use a multiple comparison procedure.
		average	4.92298	9.32887	22.1544	59.3712	725.94
		stdev	2.46122	2.81111	10.6225	34.6051	277.556					All Pairwise Multiple Comparison Procedures (Dunn's Method) :
average pg Zn in mock digests (already subtracted from metal levels shown above) =								3.83				Comparison	Diff of Ranks	Q	P<0.05
												Col 2 vs Col 1	3.5	0.738	Do Not Test
												Col 3 vs Col 1	8.5	1.792	Do Not Test
												Col 3 vs Col 2	5	1.118	Do Not Test
												Col 4 vs Col 1	12.7	2.677	No
												Col 4 vs Col 2	9.2	2.057	Do Not Test
												Col 4 vs Col 3	4.2	0.939	Do Not Test
												Col 5 vs Col 1	18.5	3.9	Yes
												Col 5 vs Col 2	15	3.354	Yes
												Col 5 vs Col 3	10	2.236	No
												Col 5 vs Col 4	5.8	1.297	Do Not Test
												Note: The multiple comparisons on ranks do not include an adjustment for ties.

## Sheet: Fig. 2
Data for Fig. 2A											Statistical analysis (output copied from Sigmaplot)
		egg water			neocuproine						One Way Analysis of Variance
	replicate	embryo	body	yolk	embryo	body	yolk				Normality Test (Shapiro-Wilk)			Passed	(P = 0.328)
# embryos	1	50	47	47	50	50	50				Equal Variance Test:			Passed	(P = 0.817)
in replicate	2	50	50	50	50	50	50
	3	47	50	50	50	50	50		sample		Group Name	N	Missing	Mean	Std Dev	SEM
									egg water: embryo		Col 1	3	0	147.73	18.58	10.727
pg Cu	1	6509.02	2265.06	2816.03	6593.65	2331.99	2844.95		egg water: body		Col 2	3	0	67.96	32.046	18.502
	2	8359.62	2537.6	4058.89	8076.26	3621.39	3587.12		egg water: yolk		Col 3	3	0	69.596	10.758	6.211
	3	6853.42	5246.69	3384.7	7344.05	3396.48	3396.48		neocuproine: embryo		Col 4	3	0	146.76	14.826	8.56
									neocuporine: body		Col 5	3	0	62.332	13.775	7.953
pg Cu/embryo,	1	130.18	48.1927	59.9156	131.873	46.6398	56.899		neocuproine: yolk		Col 6	3	0	65.524	7.709	4.451
body, or yolk	2	167.192	50.7519	81.1778	161.525	72.4277	71.7423
	3	145.817	104.934	67.6941	146.881	67.9297	67.9297				Source of Variation	DF	SS	MS	F	P
	average	144.814	71.272	72.7633	146.76	62.3324	66.0663				Between Groups	5	26265.4	5253.08	16.106	<0.001
	stdev	19.6841	35.0727	13.2377	14.8265	13.775	8.01391				Residual	12	3913.83	326.152
											Total	17	30179.2
average pg Cu in mock digests (already subtracted from metal levels shown above) = 852.218
											The differences in the mean values among the treatment groups are greater than would be expected by chance; there is a statistically significant difference (P = <0.001).
											Power of performed test with alpha = 0.050: 1.000
											All Pairwise Multiple Comparison Procedures (Holm-Sidak method):
											Overall significance level = 0.05
											Comparisons for factor:
											Comparison	Diff of Means	t	P	P<0.050
											Col 1 vs. Col 2	79.771	5.41	0.002	Yes
											Col 1 vs. Col 3	78.134	5.299	0.002	Yes
											Col 1 vs. Col 4	0.97	0.0658	0.949	No
											Col 1 vs. Col 5	85.398	5.791	0.001	Yes
											Col 1 vs. Col 6	82.206	5.575	0.002	Yes
											Col 2 vs. Col 5	5.627	0.382	0.999	No
											Col 2 vs. Col 6	2.436	0.165	0.998	No
											Col 3 vs. Col 2	1.636	0.111	0.993	No
											Col 3 vs. Col 5	7.263	0.493	0.999	No
											Col 3 vs. Col 6	4.072	0.276	1	No
											Col 4 vs. Col 2	78.8	5.344	0.002	Yes
											Col 4 vs. Col 3	77.164	5.233	0.002	Yes
											Col 4 vs. Col 5	84.427	5.726	0.001	Yes
											Col 4 vs. Col 6	81.236	5.509	0.002	Yes
											Col 6 vs. Col 5	3.191	0.216	0.999	No
Data for Fig. 2B											Statistical analysis (output copied from Sigmaplot)
		egg water			neocuproine						One Way Analysis of Variance
	replicate	embryo	body	yolk	embryo	body	yolk				Normality Test (Shapiro-Wilk)		Passed	(P = 0.328)
# embryos	1	50	47	47		50	50	50			Equal Variance Test:		Passed	(P = 0.611)
in replicate	2	50	50	50		50	50	50
	3	47	50	50		50	50	50			Group Name	N	Missing	Mean	Std Dev	SEM
											Col 1	3	0	35.115	4.064	2.347
pg Mn	1	1667.2	1182.97	118.378		1673.52	1164.26	68.8082			Col 2	3	0	26.184	1.033	0.597
	2	1988.24	1307.43	133.808		1685.68	1773.32	204.034			Col 3	3	0	2.471	0.232	0.134
	3	1515.14	1361.76	110.967		1435.65	1715.22	114.976			Col 4	3	0	31.966	2.819	1.628
											Col 5	3	0	31.019	6.723	3.881
pg Mn/embryo,	1	33.3441	25.1696	2.51868		33.4705	23.2851	1.37616			Col 6	3	0	2.585	1.375	0.794
body, or yolk	2	39.7648	26.1485	2.67616		33.7136	35.4664	4.08067
	3	32.2371	27.2351	2.21933		28.7131	34.3043	2.29952			Source of Variation	DF	SS	MS	F	P
	average	34.4706	27.3203	2.57555		31.9657	31.0186	2.58545			Between Groups	5	3381.85	676.371	55.842	<0.001
	stdev	4.83049	1.9501	0.247934		2.81949	6.72255	1.37474			Residual	12	145.346	12.112
											Total	17	3527.2
average pg Mn in mock digests (already subtracted from metal levels shown above) = 473.630
											The differences in the mean values among the treatment groups are greater than would be expected by chance; there is a statistically significant difference (P = <0.001).
											Power of performed test with alpha = 0.050: 1.000
											All Pairwise Multiple Comparison Procedures (Holm-Sidak method):
											Overall significance level = 0.05
											Comparisons for factor:
											Comparison	Diff of Means	t	P	P<0.050
											Col 1 vs. Col 2	8.931	3.143	0.058	No
											Col 1 vs. Col 3	32.644	11.488	<0.001	Yes
											Col 1 vs. Col 4	3.15	1.108	0.641	No
											Col 1 vs. Col 5	4.097	1.442	0.537	No
											Col 1 vs. Col 6	32.53	11.448	<0.001	Yes
											Col 2 vs. Col 3	23.713	8.345	<0.001	Yes
											Col 2 vs. Col 6	23.599	8.305	<0.001	Yes
											Col 4 vs. Col 2	5.781	2.035	0.33	No
											Col 4 vs. Col 3	29.494	10.379	<0.001	Yes
											Col 4 vs. Col 5	0.947	0.333	0.935	No
											Col 4 vs. Col 6	29.38	10.339	<0.001	Yes
											Col 5 vs. Col 2	4.834	1.701	0.456	No
											Col 5 vs. Col 3	28.547	10.046	<0.001	Yes
											Col 5 vs. Col 6	28.433	10.006	<0.001	Yes
											Col 6 vs. Col 3	0.114	0.0401	0.969	No
Data for Fig. 2C											Statistical analysis (output copied from Sigmaplot)
		egg water			neocuproine						One Way Analysis of Variance
	replicate	embryo	body	yolk	embryo	body	yolk				Normality Test (Shapiro-Wilk)		Passed	(P = 0.363)
# embryos	1	50	47	47		50	50	50			Equal Variance Test:		Passed	(P = 0.815)
in replicate	2	50	50	50		50	50	50
	3	47	50	50		50	50	50			Group Name	N	Missing	Mean	Std Dev	SEM
											Col 1	3	0	5.463	0.638	0.368
ng Zn	1	251.555	72.1864	130.493		274.053	64.1077	135.393			Col 2	3	0	1.712	0.246	0.142
	2	309.782	80.3552	163.859		285.076	96.9515	149.711			Col 3	3	0	2.973	0.267	0.154
	3	242.668	99.6527	143.207		254.906	90.891	137.102			Col 4	3	0	5.427	0.305	0.176
											Col 5	3	0	1.68	0.35	0.202
ng Zn/embryo,	1	5.03111	1.53588	2.77644		5.48106	1.28215	2.70787			Col 6	3	0	2.815	0.156	0.0903
body, or yolk	2	6.19565	1.6071	3.27718		5.70153	1.93903	2.99423
	3	5.16316	1.99305	2.86415		5.09813	1.81782	2.74204			Source of Variation	DF	SS	MS	F	P
	average	5.36004	1.78861	3.10325		5.4269	1.67967	2.81471			Between Groups	5	44.044	8.809	67.892	<0.001
	stdev	0.729093	0.300083	0.358293		0.305324	0.349552	0.156401			Residual	12	1.557	0.13
											Total	17	45.601
average ng Zn in mock digests (already subtracted from metal levels shown above) = 12.493
											The differences in the mean values among the treatment groups are greater than would be expected by chance; there is a statistically significant difference (P = <0.001).
											Power of performed test with alpha = 0.050: 1.000
											All Pairwise Multiple Comparison Procedures (Holm-Sidak method):
											Overall significance level = 0.05
											Comparisons for factor:
											Comparison	Diff of Means	t	P	P<0.050
											Col 1 vs. Col 2	3.751	12.755	<0.001	Yes
											Col 1 vs. Col 3	2.491	8.469	<0.001	Yes
											Col 1 vs. Col 4	0.0364	0.124	0.991	No
											Col 1 vs. Col 5	3.784	12.865	<0.001	Yes
											Col 1 vs. Col 6	2.649	9.006	<0.001	Yes
											Col 2 vs. Col 5	0.0323	0.11	0.914	No
											Col 3 vs. Col 2	1.261	4.286	0.006	Yes
											Col 3 vs. Col 5	1.293	4.396	0.006	Yes
											Col 3 vs. Col 6	0.158	0.537	0.937	No
											Col 4 vs. Col 2	3.715	12.631	<0.001	Yes
											Col 4 vs. Col 3	2.454	8.345	<0.001	Yes
											Col 4 vs. Col 5	3.747	12.741	<0.001	Yes
											Col 4 vs. Col 6	2.612	8.882	<0.001	Yes
											Col 6 vs. Col 2	1.103	3.749	0.011	Yes
											Col 6 vs. Col 5	1.135	3.859	0.011	Yes

## Sheet: GF-AAS
		Comparison of metal measurements by GF-AAS and ICP-MS
		Analysis of Cu levels in parts per billion in digested samples
			GF-AAS	ICP-MS	%
		sample	ppb Cu	ppb Cu	difference
		1	5.257	4.01894	30.8056
		2	5.588	4.30688	29.746
		3	5.396	4.24917	26.9895
		4	3.288	2.3679	38.8572
		5	3.856	2.41207	59.8625
		6	2.99	2.25702	32.4757
		7	5.928	3.92981	50.847
		8	5.796	3.88364	49.2413
		9	2.514	1.45709	72.536
		10	5.485	2.99707	83.012
				average	47.4373
				stdev	19.3504
